# Supplementary material
Source: PubMed Central journal article supplement (PMC123218)
Supplement: pnas_162077099_3.pdf [file pnas_162077099_3.pdf]

30

**CesA1** ~~~~~ ~~~~~ ~MMESGVPV  
**CesA2** MASTTMAAGF GSLAVDEVRG SSTHQSSTKV

60

**CesA1** CHTCGEHVGL NVNGEPFVAC HECNFPICKS  
**CesA2** CRVCGDKIGQ MENGQPFVAC HVCAFPVCRP

86

**CesA1** CFEYDLKEGR KACLRC. . . . .GS  
**CesA2** CYEYERSEGN QCCPQCNTRY KRHKGS
